1 **Production of sterile Atlantic salmon by germ cell ablation with antisense**  
2 **oligonucleotides**

3 Helge Tveiten<sup>1,2</sup>, Øivind Andersen<sup>1,4</sup>, Jaya Kumari Swain<sup>1,2</sup>, Hanne Johnsen<sup>1,3</sup>, Maren  
4 Mommens<sup>5</sup>, Krasimir Slanchev<sup>5\*</sup>

5 <sup>1</sup>Nofima, Muninbakken 9, N-9291 Tromsø, Norway

6 <sup>2</sup>Present address: UiT The Arctic University of Norway, N-9037 Tromsø, Norway

7 <sup>3</sup>Norwegian Polar Institute, Hjalmar Johansens gate 14, N-9296 Tromsø, Norway

8 <sup>4</sup>Department of Animal and Aquacultural Sciences, Norwegian University of Life Sciences  
9 (NMBU), N-1433, Ås, Norway

10 <sup>5</sup>AquaGen, NO-7462, Trondheim, Norway

11 \*Corresponding author

12

13 ORCID IDs: 0000-0001-5232-0178 (H.T.); 0000-0001-6460-2690 (Ø.A.)

14 Keywords: sterile salmon, Morpholino, Gapmer, antisense oligonucleotides,

15

16 **Abstract**

17 Cultivation of sterile-only fish in aquaculture offers multiple benefits of environmental,  
18 economical, and social value. A reliable method for efficient sterilization without  
19 affecting fish welfare and performance traits would have significant impact on fish  
20 production practices. Here, we demonstrate sterilization of Atlantic salmon embryos by  
21 targeting the *dead end* gene with antisense oligonucleotides. Successful gene knock  
22 down and sterilization was achieved only when using Gapmer oligonucleotides and not  
23 with morpholino oligos. Germ cell-depleted embryos developed into morphologically  
24 normal male and female salmon with rudimentary gonads devoid of gametes.

25

26 **Introduction**

27 Atlantic salmon (*Salmo salar*) is one of the most important aquaculture species with a  
28 total worldwide production exceeding 2.74 million tons in 2021(M. Shahbandeh, 2020).  
29 The species is also ecologically and culturally important, and an iconic target in  
30 recreational fishing. Intensive Atlantic salmon production mostly takes place in sea  
31 cages. Despite constantly improving quality of the equipment and implementation of  
32 stricter requirements for biosecurity, the number of escaping farmed fish is raising  
33 environmental issues for the genetic integrity of the wild stocks(Bolstad et al., 2021).  
34 In aquaculture production, salmon are commonly cultured over 3 years and harvested  
35 before reaching sexual maturity involving dramatic changes in physiology, behavior,  
36 and morphology(Taranger et al., 2010). Although beneficial to the species in their

37 natural environments, the variability in maturation timing is a significant problem for the  
38 salmon farmers. Specifically, early maturing fish often exhibit decreased growth and  
39 feed conversion efficiency(Mobley et al., 2021), reduced product quality(Davidson et  
40 al., 2018), and increased susceptibility to opportunistic microorganisms(Oidtmann et  
41 al., 2013), all causing economic loss(Rivera et al., 2022). Over the years, in an attempt  
42 to reduce precocious maturation, salmon farming industry has adopted various  
43 strategies such as photoperiod control(Bromage et al., 2001) and selective breeding  
44 for late maturation(Iversen et al., 2016) with varying success overall. In order to  
45 optimize fish welfare and performance, aquaculture breeding companies are  
46 performing intensive selection with constantly improving genetics and genomics  
47 methods. The products of these costly programs represent the main asset of the  
48 breeding companies, which is poorly protected from IPR violations.

49 A solution to all above-mentioned drawbacks would be the cultivation of reproductively  
50 sterile fish. A traditional method for large scale sterilization is inducing triploidy in  
51 fertilized eggs(Benfey, 2001). However, after careful reassessment of the pros and  
52 cons, the method is no longer recommended neither by the Norwegian Fish Farmers  
53 association (FHL) nor by the Norwegian Directorate of Fisheries (letter to Directorate  
54 for Nature Management, 2021).

55 Ablation of the primordial germ cells (PGC) appears as an appealing alternative for  
56 achieving fish sterility. Recently, a targeted CRISPR/Cas mediated knock out (KO) of  
57 *dead end (dnd)* encoding a crucial germ cell-specific RNA-binding molecule resulted  
58 in sterile Atlantic salmon(Wargelius et al., 2016). Using external *dnd* mRNA to rescue  
59 the migrating early PGCs, the authors are trying to develop this CRISPR-based  
60 approach to impose inherited sterility(Güralp et al., 2020). Nevertheless, the strategy  
61 is based on DNA manipulation and, according to the existing regulatory work frames,  
62 results in GMO fish that is currently unsuitable for farming and human consumption.

63 As an alternative to the inherited gene manipulation, transient gene downregulation  
64 can be achieved with antisense oligonucleotides (ASOs). Genetic downregulation of  
65 genes important for the PGCs development have been used to induce sterility in  
66 various fish species, using species-varying methods from transient gene knock down  
67 (KD) with morpholino oligonucleotides (MO) to mutants bearing gene KO mutations in  
68 the relevant genes (reviewed in(Wong and Zohar, 2015a)). MOs complementary bind  
69 the targeted mRNA, thereby preventing its translation or splicing(Heasman, 2002). In  
70 addition to such passive inhibition, miRNA and siRNA can trigger mRNA degradation

71 by activation of the RISC complex (Valencia-Sanchez et al., 2006). mRNA degradation  
72 can also be initiated by Ribonuclease H (RNase-H), when single-stranded DNA oligos  
73 bind to the mRNA and form DNA-RNA complex. The latter ASOs can be mimicked with  
74 Gapmers (GAPs), synthetic ASOs consisting of RNA and bridged DNA (LNA)  
75 ribonucleotides (Crooke et al., 2021). RNase-H degradation is enzymatic with the  
76 recycled GAP oligos priming the reaction. Hence, each single GAP molecule can  
77 trigger the degradation of multiple copies of the target RNA, whereas a single steric-  
78 blocking MO can only inactivate one target RNA molecule.

79 In this work, we used MOs and GAPs for downregulation of crucial PGC genes in  
80 Atlantic salmon. We find that MOs only transiently reduced the PGC numbers and  
81 failed to ablate this cell lineage during 300-500 degree days (DD) of embryonic  
82 development. In contrast, Gapmers induced degradation of the targeted mRNA and  
83 successful gene KD. Salmon embryos injected with GAPs targeting *dnd* showed  
84 absence or strong reduction of PGCs numbers and developed into sterile fish with  
85 strongly reduced gonads without gametes. The performance of the sterile fish was  
86 followed until adulthood and published in (Tveiten et al., 2022).

87

## 88 **Results**

89

### 90 **Injections of MOs targeting PGC-specific genes did not lead to PGC ablation**

91 Over the course of multiple experiments, we have designed and microinjected MOs  
92 targeting *dnd*, *dazl*, *tudor 7 (tdr7b)* and *ziwi (piwi-like1)* genes in fertilized salmon eggs.  
93 To determine the maximal dose of morpholino, we injected 100 eggs with each  
94 individual oligo in concentrations 0.5mM, 0.4mM, and 0.25mM and evaluated the  
95 mortality and the developmental defects induced by the reagent. These concentrations  
96 were then refined in 0.1mM steps to determine the highest concentration at which the  
97 mortality was in the same range as the non-injected controls and only occasional  
98 malformed embryos were observed. We fixed a fraction of the treated embryos, stained  
99 the PGCs using *vasa* antisense probe (Fig. 1E, F) and quantified their numbers at 300  
100 DD and 500 DD stages (Fig. 1B). Whereas some samples showed a reduction in the  
101 numbers of PGCs at the 300 DD stage, we did not find any embryos completely  
102 depleted from PGCs at 500 DD (Fig. 1B). In particular, we targeted salmon *dnd* gene  
103 with two morpholinos (*dndMO1*, *dndMO2*) binding close to the ATG translation start  
104 site, and a splice MO (*dndMO3*) binding at the splice donor site of Exon1 and its

105 adjusted intron (Fig. 1A and Table 1), with no significant effect on the PGC numbers at  
106 500 DD.

107

### 108 **Germ cells ablation using Gapmer oligonucleotides**

109 As translational and splicing blocking morpholinos could not trigger PGCs ablation, we  
110 set out to test ASOs employing RNase-H mediated mRNA degradation, targeting five  
111 different regions of the *dnd* coding sequence (Fig. 1A). Previous research in zebrafish  
112 have demonstrated that Gapmers (GAPs) are efficient in tenfold lower concentrations  
113 than the morpholino oligos (Pauli et al., 2015). Based on our survival titration  
114 experiment for the morpholino ASOs, we tested GAPs in 0.050mM, 0.020mM and  
115 0.005mM concentrations. As reported in the zebrafish studies, higher concentrations  
116 of the ASOs increased mortality rates of the injected embryos (Table 2). At the chosen  
117 concentration ranges, *dnd*GAP5 appeared more toxic than the other four oligos,  
118 implying sequence-related toxicity. For our further experiments, we chose GAPs  
119 concentrations at which the survival rates of the injected embryos were comparable  
120 with the ones of non-injected control, mortality most likely due to the unfertilized eggs  
121 in the batch (Table 2). Examinations of the mRNA levels at 56 DD showed rapid  
122 degradation of the targeted *dnd* mRNA already at this early developmental stage (Fig.  
123 1D). With some variations, all five Gapmers caused reduction of the number of the  
124 PGCs at both 300 and 500 DD, with up to 80% of the investigated embryos being  
125 completely PGCs free in some groups (Fig. 1C, F).

126

127

128

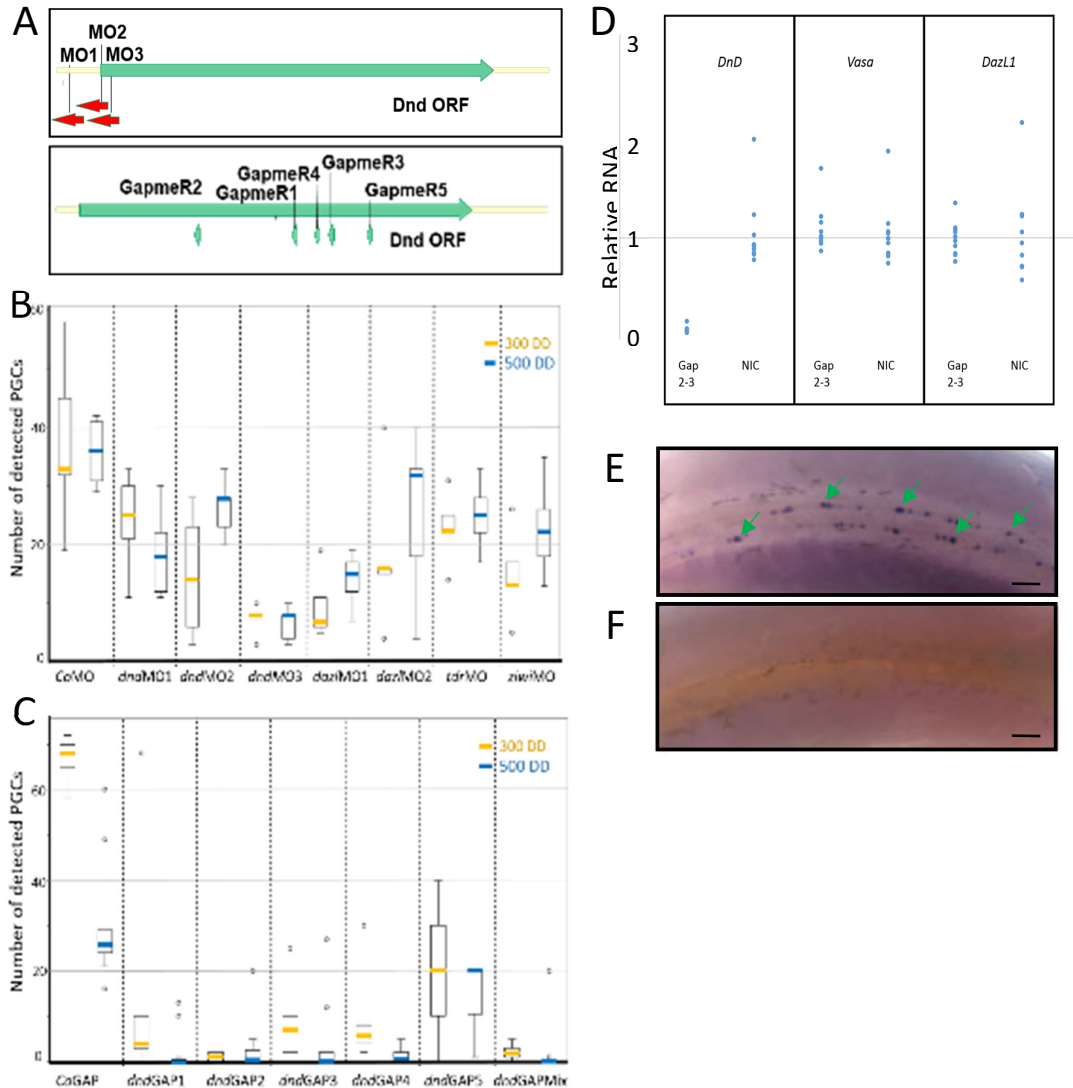

129 **Figure 1. Gapmer, but not morpholino, ASOs targeting *dnd*, lead to gene knock**  
 130 **down and germ cell ablation in salmon embryos.** A) Schematic drawing of the  
 131 regions of *dnd* mRNA targeted by the corresponding ASOs. B) Quantification of the  
 132 PGC numbers in ten salmon embryos injected with MO ASOs targeting *dnd*, *dazl*, *tdr*  
 133 and *ziwi*. No embryos completely depleted from PGCs were observed neither at 300  
 134 DD nor at 500 DD. C) Injections of five different GAP ASOs targeting the *dnd* gene  
 135 individually and as a mix led to rapid decrease in the PGC numbers, rendering up to  
 136 80% (*dndGAP2*) of the examined embryos (n=10/group) germ cell free at 300 DD and  
 137 500 DD stages. The values are presented as a box diagram, with whiskers found within  
 138 the 1.5 IQR value and outliers outside this region depicted as individual points. D)  
 139 Specific degradation of *dnd* mRNA mediated by *dndGAP2* at 56 DD stage. The levels  
 140 of the PGC-specific *vasa* and *dazl* mRNAs remained unaltered by the treatment. (NIC

141 – non-injected control). E, F) Example photographs of *vasa* WISH stained 300 DD  
142 embryos, control (E) and *dndGap2* injected (F). The germ cells are clearly visible in  
143 the control (green arrows) and absent in the *dnd* KD samples. Scale bars, 100µm.

144

#### 145 **PGC depleted salmon embryos grew into morphologically normal sterile fish**

146 To investigate the effect of *Dnd* depletion on the fish development, we injected more  
147 than 2000 eggs with *dndGap2* and raised the resulting embryos to juvenile stages  
148 (around 110g) and to adults. At these stages, randomly sampled fish injected with  
149 *dndGAP2* were externally morphologically undistinguishable from their control siblings  
150 (Fig. 2A). A detailed comparison of the production performance of the sterile and fertile  
151 groups was recently published in (Tveiten et al., 2022).

152 Dissections of randomly sampled control fish (Fig. 2 B, D) revealed, roughly even  
153 distribution between the two sexes (n=153, and (Tveiten et al., 2022)). Sterile and  
154 fertile female gonads displayed striking difference between a prominent orange  
155 structure and a faint translucent string, respectively, (Fig. 2B), while the morphological  
156 differences between the testes in sterile and fertile fish were less obvious (Fig. 2C).

157 WISH staining of the gonads with *vasa* AS probe demonstrated complete depletion of  
158 the PGC population in the *dnd* KD fish, in contrast to the intact fertile fish (Fig. 2D-G).

159 Microscopy as well as histological examinations allowed us to determine the sex of the  
160 empty gonads, confirming that the PGCs depletion did not alter the equal female to  
161 male distribution. The percentage of sterile fish sampled at different stages varied  
162 between 88% and 98%. This corresponds well with the proportion of WISH stained  
163 embryos completely devoid of PGCs at 300-500 DD, and suggest that the germ cell  
164 line may not have the capacity to re-generate beyond this stage.

165

166

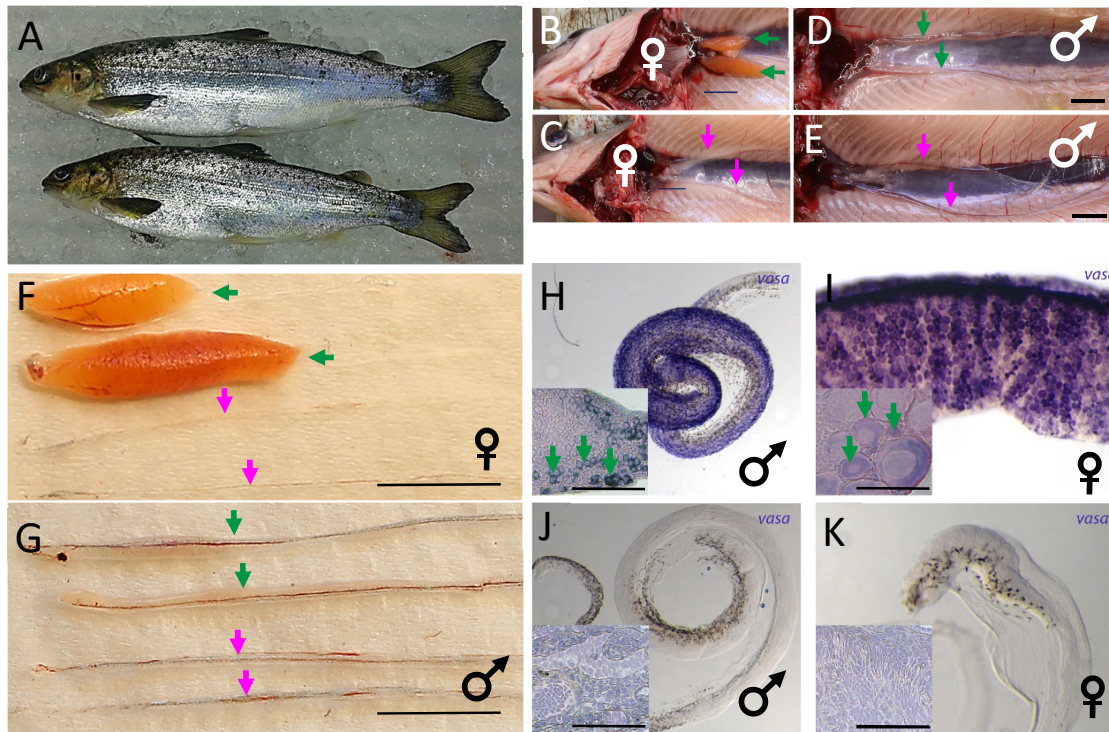

167

168 **Figure 2. Germ cells depleted embryos develop into morphologically normal,**  
169 **sterile fish.** A) A representative photo of eight-months old *dndGAP2*-treated (up) and  
170 control (down) juvenile salmon. Dissections of a female (B, C) and male (D, E) wild  
171 type and sterile juvenile fish. Green arrows indicate the normal and magenta, the  
172 rudimentary gonads. Scale bars 10mm. F, G) Magnified photos of the dissected  
173 gonads from the previous panels. Scale bar 10mm. H-K) WISH with *vasa* AS probe of  
174 male and female gonads from control (H, I) and *dnd* Gapmer-treated (J, K) juvenile  
175 fish. Insets in each panel show histological cross sections of the samples at higher  
176 magnification. The green arrows point to *vasa*-stained primary spermatogonia in (H)  
177 and developing oocytes in (I). No PGC-specific staining was detected in the sterile  
178 ovaries (J) and testes (K). Scale bar 100 µm.

179

## 180 **Discussion**

181 Antisense oligonucleotide technology is a powerful tool for altering gene expression in  
182 research and medicine (Oberemok et al., 2018; Roberts et al., 2020). In this work, we  
183 demonstrate ASO-mediated degradation of the germ cell-specific *dead end* transcript  
184 in Atlantic salmon, leading to the ablation of the PGCs lineage and resulting in sterile  
185 animals. We achieved successful gene KD by using Gapmer ASOs employing the  
186 RNase-H degradation pathway, but not with ASOs of the morpholino type. Due to their  
187 high efficiency, stability and relatively low cost, morpholinos have been the preferred  
188 ASOs used in fish research. In zebrafish, MO-mediated KD of *dnd*, *nanos3*, and *ziwi*  
189 led to PGC ablation and complete or partial infertility (Houwing et al., 2007; Weidinger  
190 et al., 2003), and *dnd* KD in goldfish, starlet, common carp and loach had similar  
191 effects (Fujimoto et al., 2010; Goto et al., 2012; Linhartová et al., 2015; Tao et al., 2022).  
192 Although there have been some reports on successful use of MOs in  
193 salmonids (Yoshizaki et al., 2016), in our hands, none of the tested oligos could trigger  
194 gene knockdown and germ cell ablation in Atlantic salmon embryos. As MO actions  
195 are known to be sequence-dependent, the simplest explanation of unsuccessful or  
196 compromised MO effects could be that none of the oligos used here were specific  
197 enough to trigger the complete KD effect. Nevertheless, we targeted *dnd*, a gene  
198 proven to be indispensable for the PGCs survival (Wargelius et al., 2016), with three  
199 different MOs, including the ATG region. Although this does not exhaust the potential  
200 targeting sites in the mRNA, manufacture-designed MOs for similar studies in zebrafish  
201 are usually very efficient. Alternative explanations for the lack of MO effect might be  
202 that salmonids develop at low temperature of 4-8 °C with relatively long ontogeny.  
203 Albeit at lower temperature, the MOs need to remain biologically active over a long  
204 period, which might be leading to compromised gene KD. In addition, the injected  
205 reagent volume, relative to the total egg volume, is far lower in salmon eggs than in  
206 zebrafish and increasing reagents concentration leads to developmental defects. In  
207 summary, transient reduction of germ cells numbers in some of the MO injected  
208 embryos, suggests that the biological activity of the injected MOs was insufficient for  
209 sustained gene KD over the entire embryonic development. The PGC recovery  
210 observed at later stages can be attributed to proliferation of the germ cells not affected  
211 by the treatment. Gapmers triggering mRNA degradation executed by the endogenous  
212 enzymes, adapted over the course of evolution, appear to be a more potent silencing  
213 tool, as demonstrated in other studies (Pendergraft et al., 2017). *dnd* mRNA, in



214 particular, is maternally deposited in the oocyte, and the rapid degradation of these  
215 mRNAs before the onset of endogenous transcription is certainly advantageous for the  
216 successful gene KD.

217 Sterile salmon produced using this molecular technology were morphologically  
218 undistinguishable from their fertile siblings. Previous experiments with *dnd* KO using  
219 CRISPR(Wargelius et al., 2016) revealed that, unlike zebrafish(Slanchev et al., 2005),  
220 salmon embryos depleted from the PGCs retained sexual identity and developed either  
221 male or female gonads. Our work confirms that the sex determination in salmon is  
222 uncoupled from the germ cell presence and PGC ablation method. Interestingly,  
223 CRISPR generated sterile fish failed to undergo puberty and did not produce sexual  
224 hormones upon stimulation(Kleppe et al., 2017). GAP sterilization did not hinder  
225 gonadal sex steroid synthesis in the early maturing males(Tveiten et al., 2022).  
226 However, the circulating sex steroid concentrations decreased to basal levels after  
227 seawater transfer that might indicate termination of sexual maturation in the GAP  
228 sterilized fish as well.

229 An efficient large-scale method for delivering oligonucleotides would be crucial for  
230 potential aquaculture application of ASO-mediated fish sterilization. In this work, ASOs  
231 were delivered into fertilized salmon eggs through manual microinjections, a laborious  
232 method prone to errors. Correspondingly, we observed fluctuations in the success rate  
233 of the treatment, which we attribute to imperfect delivery. GAP ASOs appear to be very  
234 potent in specifically degrading the targeted mRNA (Fig. 1 and (Pauli et al., 2015)).  
235 Their catalytic-like mechanism of action permits effective usage at very low cellular  
236 concentrations. In addition, due to the chemical modifications, GAPs are resistant to  
237 nucleases and highly resilient to degradation(Crooke et al., 2021). These features  
238 could be utilized in the development of protocols for ASOs delivery with incubation of  
239 eggs and sperm in solutions with active ASOs. An interesting study in 2015 reported  
240 on successful delivery of modified MOs to zebrafish eggs with a bath incubation(Wong  
241 and Zohar, 2015b). Further, methods developed for targeted drug delivery with various  
242 nanocarriers as vehicles might also be successful as delivery strategies targeting  
243 gonads, unfertilized eggs and sperm (Reviewed in(Edis et al., 2021)). The high  
244 potency, specificity, relatively low cost, and non-GMO nature of action place Gapmers  
245 among the top candidates for sterilizing agents provided a successful large-scale  
246 delivery protocol is established.

247

248

## 249 **Methods**

### 250 **Experimental procedures**

251 Salmon eggs were produced under commercial settings by AquaGen, Norway and  
252 provided for the experiments. One-cell stage fertilized eggs were aligned in a custom-  
253 made setup and microinjected into the cell using pressurized microinjector from World  
254 Precision Instruments. Injection volumes were optically adjusted to about 5% from the  
255 cell volume. Injected eggs were incubated at 4-8°C to 56, 300 and 500DD stages and  
256 sampled for the experiments. More than 2000 control and *dnd*GAP2 injected embryos  
257 were transferred after hatching to standard hatchery conditions (continues light, food  
258 in excess and temperature varying from 4-12°C and reared there until 8 months of age,  
259 when a fraction was sampled for gonads inspection and histology. Throughout the  
260 experiment fish were sampled and anaesthetized in Benzoak™-Vet (ACD Pharma),  
261 containing 20% w/w Benzocaine as active substance, and killed using an overdose  
262 (1 ml/L) (see also (Tveiten et al., 2022)).

263 The sex of the juvenile fish was determined under a stereo microscope, after abdominal  
264 section and removal of the internal organs. The differences between fertile and sterile  
265 fish from both sexes is shown in Fig. 2.

266

### 267 **RNA extraction and complementary DNA synthesis**

268 Total RNA was extracted using conventional TRIzol method as described in (Kleppe et  
269 al., 2015). Briefly, eggs were homogenized in a TissueLyser (Qiagen) using steel  
270 beads with Trizol (Invitrogen). Homogenized samples were treated with chloroform,  
271 and RNA was precipitated with isopropanol, washed with 80% ethanol and dissolved  
272 in nuclease-free water. Genomic DNA contaminant was removed with DNase  
273 treatment using TURBO DNafree™ Kit (Thermo Fisher Scientific) according to the  
274 manufacturer protocol. The quality and concentration of the RNA were determined  
275 spectrophotometrically by Nano Drop (Nano Drop Technologies). The measured  
276 A260/A280 ratio of 1.9–2.0 indicated high purity RNA.

277 RNA samples were reverse-transcribed with High-Capacity RNA-to-cDNA™ Kit  
278 (Thermo Fisher Scientific) using 200 ng RNA in 20 µl reaction volumes The reaction  
279 was incubated in a thermocycler for 37°C for 60 min and stopped by heating at 95°C  
280 for 5 min before hold at 4°C. The synthesized complementary DNA (cDNA) was diluted  
281 1:40 and used as a template for qPCR analysis.

282

### 283 **qPCR analysis**

284 qPCR was used to measure relative expression of PGC-related genes. Specific  
285 primers were designed using Primer blast (NCBI) and Integrated DNA Technologies  
286 (Table 1). The amplification efficiency of each primer pair was calculated using a  
287 twofold dilution series of a cDNA mixture according to the equation:  $E = 10^{-1/\text{slope}}$   
288 (Pfaffl, 2001). The melting peak for each amplicon was inspected to check for  
289 unwanted amplification products. A control reaction to verify the absence of genomic  
290 DNA was conducted on three randomly selected RNA samples. The qPCR was run in  
291 duplicates in 7500HT sequence Detection system (Applied Biosystems) using the  
292 following recommended parameters: Standard run mode with 40 cycles at 50°C for  
293 2 min, 95°C for 10 min, and 60°C for 1 min. Following by the melt curve stage at 95°C  
294 for 15 s, 60°C for 1 min, and 95°C for 15 s. Ct threshold was set between 0.1 and 0.2.  
295 Each well contained Fast SYBR Green PCR Master Mix, 500 nM final concentration of  
296 each primer, 5 µl diluted cDNA (1:40) and nuclease free water (Ambion) to a final  
297 reaction volume of 15 µl. All data were collected by the 7500 Software and Analysis  
298 Software (Applied Biosystem) and exported to Microsoft Excel for further analyses. The  
299 Pfaffl method was used to calculate relative expression (Pfaffl, 2001). The geometric  
300 mean (Anstaett et al., 2010) of the three reference genes  $\beta$ 1-actin, elongation factor  
301 1 $\alpha$  (ef1 $\alpha$ ), and ribosomal protein 18S were used to normalize the gene expression and  
302 remove nonbiological variation. Values from the control fish was used as calibrator as  
303 denoted by Pfaffl(Pfaffl, 2001).

304

### 305 **Reagents**

306 All ASOs sequences can be found in Table 1. *dazl* (XM\_014178361), *tudor7b*  
307 (XM\_014207215), *ziwi* (*piwi-like*, XM\_014171836)

308 All morpholino ASOs were designed by GeneTools prediction software based on the  
309 Salmon Genome Assembly at NCBI.

310 Gapmer ASOs were designed by Exicon/Quiagen prediction software, based on the  
311 CDS of Atlantic salmon *dnd1* gene (acc. JN712911). The mimics were composed of  
312 2'-OMe locked nucleic acids (LNA) and phosphorothioated (PS) of the DNA  
313 backbone (Exicon/Quiagen).

314 Lyophilized ASOs were dissolved in nuclease free water to 100µM stock solution.  
315 The final concentration in the injection mix is indicated in Table 1, diluted in 1x  
316 Danieau's solution with 0.5% Phenol Red.

317

### 318 **Whole mount *in situ* hybridization (WISH) and histology**

319 WISH of salmon embryos was performed as described in(Nagasawa et al., 2013) using  
320 1kb fragment from the cDNA of the salmon *vasa* gene (JN712912) as a probe. For  
321 histological analyses, gonads from juvenile fish were dissected out, fixed in 4% PFA  
322 overnight and subjected to the same WISH procedure as the embryos. Subsequently,  
323 the tissue was dehydrated, embedded in Technovit 7100 (Electron Microscopy  
324 Sciences), sectioned at 6µm thickness, and counter-stained with Eosin according to  
325 conventional histological procedures. The sections were then imaged at a Zeiss  
326 Axioplan microscope at 20x magnification.

327

328

### 329 **Ethical statements**

330 The experimental protocols were planned according to the ARRIVE guidelines and  
331 approved by the Norwegian Food Safety Authority (FOTS permit ID 17389), in  
332 accordance with the animal welfare law of Norway and the instruction for use of  
333 animals for research [https://www.forskningsetikk.no/en/guidelines/science-and-  
334 technology/ethical-guidelines-for-the-use-of-animals-in-research/](https://www.forskningsetikk.no/en/guidelines/science-and-technology/ethical-guidelines-for-the-use-of-animals-in-research/)

335

### 336 **Data availability**

337 The data generated and/or analyzed in the current study are provided in the paper.

338

### 339 **Funding**

340 This work has been partially funded by the Research Council of Norway,  
341 BIOTEK2021 project SALMOSTERILE (221648).

342

343

344 **Table 1. ASOs sequences (5' to 3' direction)**

| ASO                                  | Sequence                   |
|--------------------------------------|----------------------------|
| T blocking <i>dnd</i> MO1            | ACAATTACCGAAACTGATTTCTAGT  |
| T blocking <i>dnd</i> MO2            | CTGACTTGAACGCTCCTCCATTATC  |
| S blocking (Ex1-Int1) <i>dnd</i> MO3 | GTTATGCTATTTTCAGTTTACCTGAC |
| T blocking <i>dazl</i> MO            | GAATAAATTAACACACTGCCGCGC   |
| T blocking <i>tdr7b</i> MO           | TTCTTCATCAGATCGTCAGACATCC  |
| T blocking <i>ziwi</i> MO            | GCCAGTCATTTTCAGCTTCTAAAAC  |
| GAP sequences                        |                            |
| <i>dnd</i> GAP1                      | GCCAGCCCGAAGCGTT           |
| <i>dnd</i> GAP2                      | AACGAGCGGATGGCGG           |
| <i>dnd</i> GAP3                      | GAGCAGCGAGGAGGTT           |
| <i>dnd</i> GAP4                      | TTGGAGGGTCTGGGAG           |
| <i>dnd</i> GAP5                      | GATTCAGGAGCAGCGT           |
| RT PCR Primers                       |                            |
| <i>dnd</i> F                         | CACAAGGAGGGAGCAACTG        |
| <i>dnd</i> R                         | GCACAAGGAGGGAGCAACTG       |
| <i>vas</i> F                         | CCAGTACAGAAGCATGGCATTTC    |
| <i>vas</i> R                         | CCGTTTTCCAGATCCAGTCT       |
| <i>dazl</i> F                        | TGTTGGAGGAATCGACATG        |
| <i>dazl</i> R                        | TGAGTACAGGTGAGGGCTG        |

345

346 **Table 2. Survival rates of Gapmer injected embryos.**

| Gapmer           | Conc. (μM) | Dead | Alive | Total | Survival (%) |
|------------------|------------|------|-------|-------|--------------|
| <b>dndGAP1-1</b> | 50         | 79   | 10    | 89    | 11.2         |
| <b>dndGAP1-2</b> | 20         | 23   | 67    | 90    | 74.4         |
| <b>dndGAP1-3</b> | 5          | 30   | 65    | 95    | 68.4         |
| <b>dndGAP2-1</b> | 50         | 78   | 5     | 83    | 6            |
| <b>dndGAP2-2</b> | 20         | 63   | 15    | 78    | 19.2         |
| <b>dndGAP2-3</b> | 5          | 17   | 66    | 83    | 79.5         |
| <b>dndGAP3-1</b> | 50         | 84   | 0     | 84    | 0            |
| <b>dndGAP3-2</b> | 20         | 66   | 8     | 74    | 10.8         |
| <b>dndGAP3-3</b> | 5          | 28   | 61    | 89    | 68.5         |
| <b>dndGAP4-1</b> | 50         | 19   | 64    | 83    | 77.1         |
| <b>dndGAP4-2</b> | 20         | 19   | 66    | 85    | 77.6         |

|                  |    |    |    |    |      |
|------------------|----|----|----|----|------|
| <b>dndGAP4-3</b> | 5  | 20 | 58 | 78 | 74.4 |
| <b>dndGAP5-1</b> | 50 | 72 | 0  | 72 | 0    |
| <b>dndGAP5-2</b> | 20 | 68 | 8  | 76 | 10.5 |
| <b>dndGAP5-3</b> | 5  | 55 | 20 | 75 | 26.7 |
| <b>Control</b>   | 0  | 16 | 69 | 85 | 81.2 |

347

348

349

## 350 **References**

- 351 Anstaett, O.L., Brownlie, J., Collins, M.E., Thomas, C.J., 2010. Validation of endogenous  
352 reference genes for RT-qPCR normalisation in bovine lymphoid cells (BL-3) infected with  
353 Bovine Viral Diarrhoea Virus (BVDV). *Veterinary Immunology and Immunopathology* 137,  
354 201–207. <https://doi.org/10.1016/j.vetimm.2010.05.006>
- 355 Benfey, T., 2001. Use of sterile triploid Atlantic salmon (*Salmo salar* L.) for aquaculture in  
356 New Brunswick, Canada. *ICES Journal of Marine Science* 58, 525–529.  
357 <https://doi.org/10.1006/jmsc.2000.1019>
- 358 Bolstad, G.H., Karlsson, S., Hagen, I.J., Fiske, P., Urdal, K., Sægrov, H., Florø-Larsen, B.,  
359 Sollien, V.P., Østborg, G., Diserud, O.H., Jensen, A.J., Hindar, K., 2021. Introgression from  
360 farmed escapees affects the full life cycle of wild Atlantic salmon. *Sci. Adv.* 7, eabj3397.  
361 <https://doi.org/10.1126/sciadv.abj3397>
- 362 Bromage, N., Porter, M., Randall, C., 2001. The environmental regulation of maturation in  
363 farmed finfish with special reference to the role of photoperiod and melatonin. *Aquaculture*  
364 197, 63–98. [https://doi.org/10.1016/S0044-8486\(01\)00583-X](https://doi.org/10.1016/S0044-8486(01)00583-X)
- 365 Crooke, S.T., Baker, B.F., Crooke, R.M., Liang, X., 2021. Antisense technology: an overview  
366 and prospectus. *Nat Rev Drug Discov* 20, 427–453. [https://doi.org/10.1038/s41573-021-](https://doi.org/10.1038/s41573-021-00162-z)  
367 [00162-z](https://doi.org/10.1038/s41573-021-00162-z)
- 368 Davidson, J., Kenney, P.B., Barrows, F.T., Good, C., Summerfelt, S.T., 2018. Fillet Quality  
369 and Processing Attributes of Postsmolt Atlantic Salmon, *Salmo salar*, Fed a Fishmeal-free  
370 Diet and a Fishmeal-based Diet in Recirculation Aquaculture Systems: FILLET QUALITY  
371 AND PROCESSING ATTRIBUTES OF POSTSMOLT ATLANTIC SALMON. *J World*  
372 *Aquacult Soc* 49, 183–196. <https://doi.org/10.1111/jwas.12452>
- 373 Edis, Z., Wang, J., Waqas, M.K., Ijaz, Muhammad, Ijaz, Munazza, 2021. Nanocarriers-  
374 Mediated Drug Delivery Systems for Anticancer Agents: An Overview and Perspectives. *IJN*  
375 Volume 16, 1313–1330. <https://doi.org/10.2147/IJN.S289443>
- 376 Fujimoto, T., Nishimura, T., Goto-Kazeto, R., Kawakami, Y., Yamaha, E., Arai, K., 2010.  
377 Sexual dimorphism of gonadal structure and gene expression in germ cell-deficient loach, a  
378 teleost fish. *Proc. Natl. Acad. Sci. U.S.A.* 107, 17211–17216.  
379 <https://doi.org/10.1073/pnas.1007032107>
- 380 Goto, R., Saito, T., Takeda, T., Fujimoto, T., Takagi, M., Arai, K., Yamaha, E., 2012. Germ  
381 cells are not the primary factor for sexual fate determination in goldfish. *Developmental*  
382 *Biology* 370, 98–109. <https://doi.org/10.1016/j.ydbio.2012.07.010>
- 383 Güralp, H., Skaftnesmo, K.O., Kjærner-Semb, E., Straume, A.H., Kleppe, L., Schulz, R.W.,  
384 Edvardsen, R.B., Wargelius, A., 2020. Rescue of germ cells in dnd crispant embryos opens  
385 the possibility to produce inherited sterility in Atlantic salmon. *Sci Rep* 10, 18042.  
386 <https://doi.org/10.1038/s41598-020-74876-2>
- 387 Heasman, J., 2002. Morpholino Oligos: Making Sense of Antisense? *Developmental Biology*  
388 243, 209–214. <https://doi.org/10.1006/dbio.2001.0565>



- 389 Houwing, S., Kamminga, L.M., Berezikov, E., Cronembold, D., Girard, A., van den Elst, H.,  
390 Filippov, D.V., Blaser, H., Raz, E., Moens, C.B., Plasterk, R.H.A., Hannon, G.J., Draper,  
391 B.W., Ketting, R.F., 2007. A Role for Piwi and piRNAs in Germ Cell Maintenance and  
392 Transposon Silencing in Zebrafish. *Cell* 129, 69–82.  
393 <https://doi.org/10.1016/j.cell.2007.03.026>
- 394 Iversen, M., Myhr, A.I., Wargelius, A., 2016. Approaches for delaying sexual maturation in  
395 salmon and their possible ecological and ethical implications. *Journal of Applied Aquaculture*  
396 28, 330–369. <https://doi.org/10.1080/10454438.2016.1212756>
- 397 Kleppe, L., Andersson, E., Skaftnesmo, K.O., Edvardsen, R.B., Fjellidal, P.G., Norberg, B.,  
398 Bogerd, J., Schulz, R.W., Wargelius, A., 2017. Sex steroid production associated with puberty  
399 is absent in germ cell-free salmon. *Sci Rep* 7, 12584. <https://doi.org/10.1038/s41598-017-12936-w>  
400
- 401 Kleppe, L., Wargelius, A., Johnsen, H., Andersson, E., Edvardsen, R.B., 2015. Gonad specific  
402 genes in Atlantic salmon (*Salmo salar* L.): Characterization of *tdrd7-2*, *dazl-2*, *piwil1* and  
403 *tdrd1* genes. *Gene* 560, 217–225. <https://doi.org/10.1016/j.gene.2015.02.008>
- 404 Linhartová, Z., Saito, T., Kašpar, V., Rodina, M., Prášková, E., Hagihara, S., Pšenička, M.,  
405 2015. Sterilization of sterlet *Acipenser ruthenus* by using knockdown agent, antisense  
406 morpholino oligonucleotide, against dead end gene. *Theriogenology* 84, 1246-1255.e1.  
407 <https://doi.org/10.1016/j.theriogenology.2015.07.003>
- 408 M. Shahbandeh, 2020. GAA. (December 9, 2019). Production of Atlantic salmon worldwide  
409 from 2000 to 2021 (in 1,000 metric tons). In Statista. Retrieved September 14, 2022, from  
410 <https://www.statista.com/statistics/1179062/global-atlantic-salmon-production/>.
- 411 Mobley, K.B., Aykanat, T., Czorlich, Y., House, A., Kurko, J., Miettinen, A., Moustakas-  
412 Verho, J., Salgado, A., Sinclair-Waters, M., Verta, J.-P., Primmer, C.R., 2021. Maturation in  
413 Atlantic salmon (*Salmo salar*, Salmonidae): a synthesis of ecological, genetic, and molecular  
414 processes. *Rev Fish Biol Fisheries* 31, 523–571. <https://doi.org/10.1007/s11160-021-09656-w>
- 415 Nagasawa, K., Fernandes, J.M.O., Yoshizaki, G., Miwa, M., Babiak, I., 2013. Identification  
416 and migration of primordial germ cells in Atlantic salmon, *Salmo salar*: Characterization of  
417 *Vasa*, *Dead End*, and *Lymphocyte antigen 75* genes. *Mol. Reprod. Dev.* 80, 118–131.  
418 <https://doi.org/10.1002/mrd.22142>
- 419 Oberemok, V., Laikova, K., Repetskaya, A., Kenyo, I., Gorlov, M., Kasich, I., Krasnodubets,  
420 A., Gal'chinsky, N., Fomochkina, I., Zaitsev, A., Bekirova, V., Seidosmanova, E., Dydik, K.,  
421 Meshcheryakova, A., Nazarov, S., Smagliy, N., Chelengerova, E., Kulanova, A., Deri, K.,  
422 Subbotkin, M., Useinov, R., Shumskykh, M., Kubyshkin, A., 2018. A Half-Century History  
423 of Applications of Antisense Oligonucleotides in Medicine, Agriculture and Forestry: We  
424 Should Continue the Journey. *Molecules* 23, 1302.  
425 <https://doi.org/10.3390/molecules23061302>
- 426 Oidtmann, B., LaPatra, S.E., Verner-Jeffreys, D., Pond, M., Peeler, E.J., Noguera, P.A.,  
427 Bruno, D.W., St-Hilaire, S., Schubiger, C.B., Snekvik, K., Crumlish, M., Green, D.M.,  
428 Metselaar, M., Rodger, H., Schmidt-Posthaus, H., Galeotti, M., Feist, S.W., 2013. Differential  
429 characterization of emerging skin diseases of rainbow trout – a standardized approach to

- 430 capturing disease characteristics and development of case definitions. *J Fish Dis* 36, 921–937.  
431 <https://doi.org/10.1111/jfd.12086>
- 432 Pauli, A., Montague, T.G., Lennox, K.A., Behlke, M.A., Schier, A.F., 2015. Antisense  
433 Oligonucleotide-Mediated Transcript Knockdown in Zebrafish. *PLoS ONE* 10, e0139504.  
434 <https://doi.org/10.1371/journal.pone.0139504>
- 435 Pendergraff, H.M., Krishnamurthy, P.M., Debacker, A.J., Moazami, M.P., Sharma, V.K.,  
436 Niiitsoo, L., Yu, Y., Tan, Y.N., Haitchi, H.M., Watts, J.K., 2017. Locked Nucleic Acid  
437 Gapmers and Conjugates Potently Silence ADAM33, an Asthma-Associated Metalloprotease  
438 with Nuclear-Localized mRNA. *Molecular Therapy - Nucleic Acids* 8, 158–168.  
439 <https://doi.org/10.1016/j.omtn.2017.06.012>
- 440 Pfaffl, M.W., 2001. A new mathematical model for relative quantification in real-time RT-  
441 PCR. *Nucleic Acids Research* 29, 45e–445. <https://doi.org/10.1093/nar/29.9.e45>
- 442 Rivera, P., Gallardo, J., Araneda, C., Vasemägi, A., 2022. Sexual Maturation in Farmed  
443 Atlantic Salmon (*Salmo salar*): A Review, in: Lu, Q. (Ed.), *Salmon Aquaculture*.  
444 IntechOpen. <https://doi.org/10.5772/intechopen.99471>
- 445 Roberts, T.C., Langer, R., Wood, M.J.A., 2020. Advances in oligonucleotide drug delivery.  
446 *Nat Rev Drug Discov* 19, 673–694. <https://doi.org/10.1038/s41573-020-0075-7>
- 447 Slanchev, K., Stebler, J., de la Cueva-Méndez, G., Raz, E., 2005. Development without germ  
448 cells: The role of the germ line in zebrafish sex differentiation. *Proc. Natl. Acad. Sci. U.S.A.*  
449 102, 4074–4079. <https://doi.org/10.1073/pnas.0407475102>
- 450 Tao, B., Liao, X., Chen, L., Li, Y., Chen, K., Jia, S., Wu, X., Ma, W., Wu, Y., Zhong, W.,  
451 Chen, J., Song, Y., Hu, W., 2022. Germ cells are not essential for sexual dimorphism of  
452 gonads in common carp, *C. carpio* L. *Aquaculture* 547, 737501.  
453 <https://doi.org/10.1016/j.aquaculture.2021.737501>
- 454 Taranger, G.L., Carrillo, M., Schulz, R.W., Fontaine, P., Zanuy, S., Felip, A., Weltzien, F.-A.,  
455 Dufour, S., Karlsten, Ø., Norberg, B., Andersson, E., Hansen, T., 2010. Control of puberty in  
456 farmed fish. *General and Comparative Endocrinology* 165, 483–515.  
457 <https://doi.org/10.1016/j.ygcen.2009.05.004>
- 458 Tveiten H., Karlsten K., Thesslund T., Johansson G. S., Thiyagarajan D. B., Andersen Ø.,  
459 Molecular Reproduction Devel, Impact of germ cell ablation on the activation of the brain–  
460 pituitary–gonadal axis in precocious Atlantic salmon (*Salmo salar* L.) males  
461 doi:10.1002/mrd.23635.(2022)
- 462 Valencia-Sanchez, M.A., Liu, J., Hannon, G.J., Parker, R., 2006. Control of translation and  
463 mRNA degradation by miRNAs and siRNAs: Table 1. *Genes Dev.* 20, 515–524.  
464 <https://doi.org/10.1101/gad.1399806>
- 465 Wargelius, A., Leininger, S., Skaftnesmo, K.O., Kleppe, L., Andersson, E., Taranger, G.L.,  
466 Schulz, R.W., Edvardsen, R.B., 2016. Dnd knockout ablates germ cells and demonstrates  
467 germ cell independent sex differentiation in Atlantic salmon. *Sci Rep* 6, 21284.  
468 <https://doi.org/10.1038/srep21284>

- 469 Weidinger, G., Stebler, J., Slanchev, K., Dumstrei, K., Wise, C., Lovell-Badge, R., Thisse, C.,  
470 Thisse, B., Raz, E., 2003. *dead end*, a Novel Vertebrate Germ Plasm Component, Is Required  
471 for Zebrafish Primordial Germ Cell Migration and Survival. *Current Biology* 13, 1429–1434.  
472 [https://doi.org/10.1016/S0960-9822\(03\)00537-2](https://doi.org/10.1016/S0960-9822(03)00537-2)
- 473 Wong, T.-T., Zohar, Y., 2015a. Production of reproductively sterile fish: A mini-review of  
474 germ cell elimination technologies. *General and Comparative Endocrinology* 221, 3–8.  
475 <https://doi.org/10.1016/j.ygcen.2014.12.012>
- 476 Wong, T.-T., Zohar, Y., 2015b. Production of reproductively sterile fish by a non-transgenic  
477 gene silencing technology. *Sci Rep* 5, 15822. <https://doi.org/10.1038/srep15822>
- 478 Yoshizaki, G., Takashiba, K., Shimamori, S., Fujinuma, K., Shikina, S., Okutsu, T., Kume, S.,  
479 Hayashi, M., 2016. Production of germ cell-deficient salmonids by *dead end* gene  
480 knockdown, and their use as recipients for germ cell transplantation: P RODUCTION OF G  
481 ERM C ELL -D EFICIENT S ALMONIDS. *Mol. Reprod. Dev.* 83, 298–311.  
482 <https://doi.org/10.1002/mrd.22625>
- 483
